# Supplementary material for: GPU-HADVPPM V1.0: a high-efficiency parallel GPU design of the piecewise parabolic method (PPM) for horizontal advection in an air quality model (CAMx V6.10)
Source: Copernicus journal article supplement (doi:10.5194/gmd-16-4367-2023), 2023-08-01
Supplement: Supplementary file 1 [file gmd-16-4367-2023-supplement.pdf]

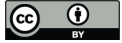

*Supplement of*

## **GPU-HADVPPM V1.0: a high-efficiency parallel GPU design of the piecewise parabolic method (PPM) for horizontal advection in an air quality model (CAMx V6.10)**

**Kai Cao et al.**

*Correspondence to:* Qizhong Wu (wqizhong@bnu.edu.cn), Lingling Wang (928216422@qq.com), and Lanning Wang (wangln@bnu.edu.cn)

The copyright of individual parts of the supplement might differ from the article licence.

# Supplementary Material

```

#Advection in x-direction
do k=1,nalv
  dtuse = deltat/nadv(k)
  do istep = 1,nadv(k)
    do j=m_xj1,m_xj2
      ...
      do i=1,m1
        av1d(i) = ***
        v1d(i) = ***
        a1d(i) = ***
      end do
      ...
      do ispc=nrads+1,nspe
        do i=1,m1
          c1d(i) = ***
        end do
        ...
        call hadvppm(m1,dtuse,dx(j+j0),c1d,v1d,
          & a1d,av1d,flxarr)
        ...
      end do ! ispc
    end do ! j
  end do ! istep
end do ! k

```

(a) Original Fortran code

```

#Advection in x-direction
do k=1,nalv
  dtuse1d(k) = deltat/nadv(k)
  do j=m_xj1,m_xj2
    ...
    do ispc=nrads+1,nspe
      ...
      do i=1,m1
        av3d(i,j,k) = ***
        v3d(i,j,k) = ***
        a3d(i,j,k) = ***
        c4d(i,j,k,ispc) = ***
      end do ! i
    end do ! ispc
  end do ! j
end do ! k

```

(b) Optimized Fortran code

Figure S1. An example of xyadvec Fortran program optimization. (a) and (b) represent original code and optimized code, respectively.

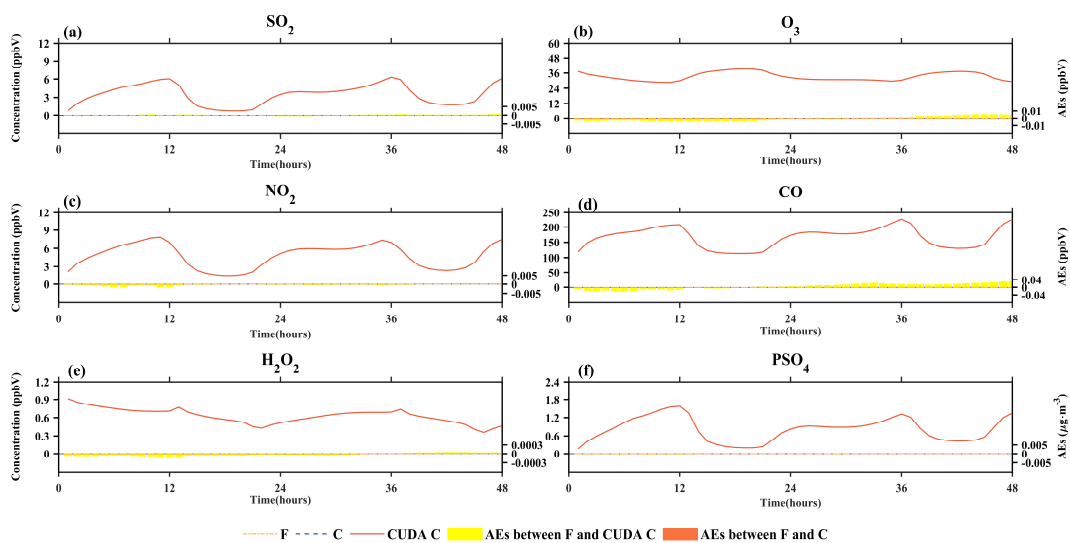

Figure S2. Time series and AEs of SO<sub>2</sub>, O<sub>3</sub>, NO<sub>2</sub>, CO, H<sub>2</sub>O<sub>2</sub>, and PSO<sub>4</sub> outputted by CAMx model for Fortran, standard C, and CUDA C versions.

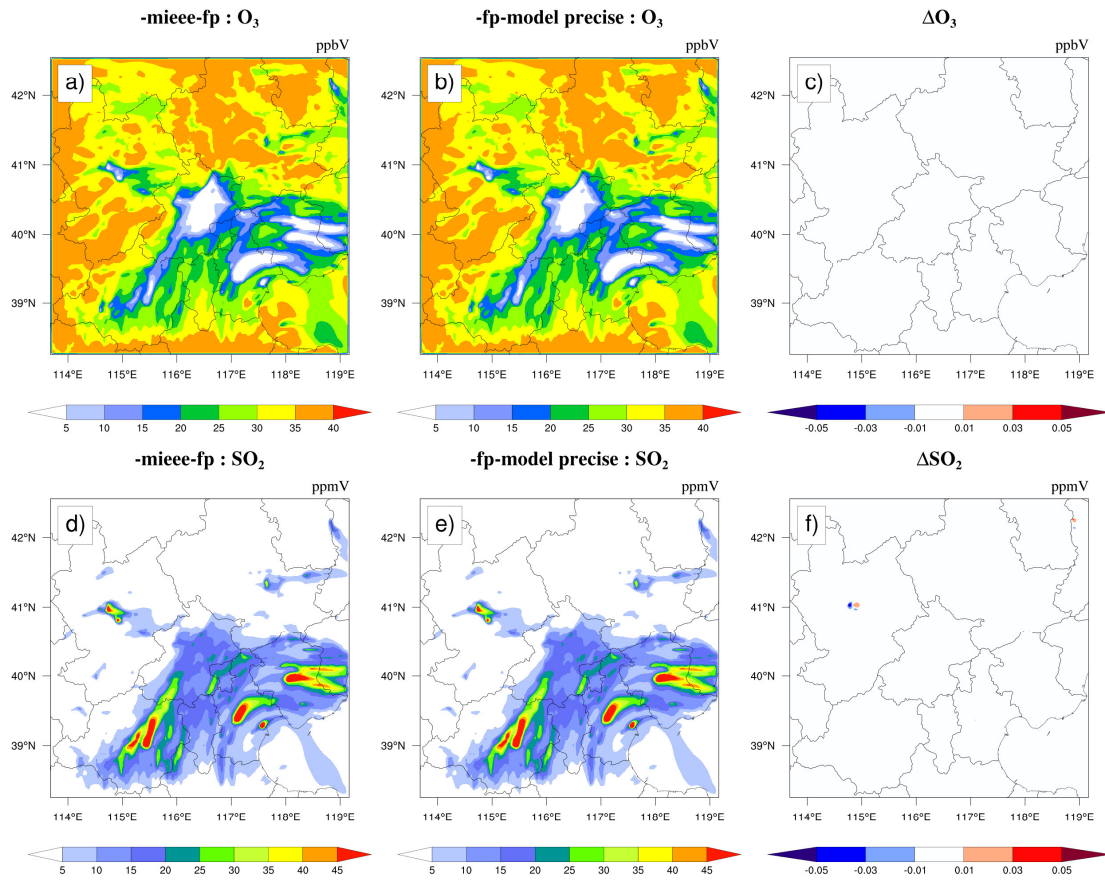

Figure S3. The absolute errors (AEs) of the simulation results between the *-fp model precise* and *-miecee-fp* compile flags.

Table S1. Variable names input into the HADVPPM program and their specific meanings.

| Name       | Specific Meanings (Unit)                                     |
|------------|--------------------------------------------------------------|
| <i>nn</i>  | Number of cells                                              |
| <i>dt</i>  | Time step (s)                                                |
| <i>dx</i>  | Length of cell (m)                                           |
| <i>con</i> | Concentration vector ( $\mu\text{mol} \cdot \text{m}^{-3}$ ) |
| <i>vel</i> | Wind speed vector ( $\text{m} \cdot \text{s}^{-1}$ )         |

|              |                                              |
|--------------|----------------------------------------------|
| <i>area</i>  | Cell area adjustment vector ( $m^{-2}$ )     |
| <i>areav</i> | Interfacial area adjustment vector ( $m^2$ ) |

Table S2. The physical and chemical numerical methods selected during CAMx integration

| <b>Process</b>                                  | <b>Numerical Methods</b>                                                             |
|-------------------------------------------------|--------------------------------------------------------------------------------------|
| Horizontal advection                            | PPM (Colella and Woodward, 1984)                                                     |
| Vertical diffusion                              | K-theory 1 <sup>st</sup> order closure                                               |
| Aqueous-phase oxidation                         | Regional Acid Deposition Model<br>(RADM-AQ, (Chang et al., 1987))                    |
| Inorganic aerosol<br>thermodynamic partitioning | ISORROPIA (Nenes et al., 1999)                                                       |
| Gas-Phase Chemistry                             | Carbon Bond 2005 (Yarwood et al., 2005)<br>EBI solver (Hertel et al., 1993)          |
| Dry deposition                                  | Resistance model for gases (Zhang et al., 2003)<br>and aerosols (Zhang et al., 2001) |
| Wet deposition                                  | Scavenging model for gases<br>and aerosols (Seinfeld et al., 1998)                   |

## Reference

- Chang, J. S., Brost, R. A., Isaksen, I. S. A., Madronich, S., Middleton, P., Stockwell, W. R., and Walcek, C. J.: A three-dimensional Eulerian acid deposition model: Physical concepts and formulation, *Journal of Geophysical Research: Atmospheres*, 92, 14681-14700, <https://doi.org/10.1029/JD092iD12p14681>, 1987.
- Colella, P. and Woodward, P. R.: The Piecewise Parabolic Method (PPM) for gas-dynamical simulations, *Journal of Computational Physics*, 54, 174-201, [https://doi.org/10.1016/0021-9991\(84\)90143-8](https://doi.org/10.1016/0021-9991(84)90143-8), 1984.
- Hertel, O., Berkowicz, R., Christensen, J., and Hov, Ø.: Test of two numerical schemes for use in atmospheric transport-chemistry models, *Atmospheric Environment. Part A. General Topics*, 27, 2591-2611, <https://doi.org/10.1016/0960->

1686(93)90032-T, 1993.

Nenes, A., Pandis, S. N., and Pilinis, C.: Continued development and testing of a new thermodynamic aerosol module for urban and regional air quality models, *Atmospheric Environment*, 33, 1553-1560, [https://doi.org/10.1016/S1352-2310\(98\)00352-5](https://doi.org/10.1016/S1352-2310(98)00352-5), 1999.

Seinfeld, J. H., Pandis, S. N., and Noone, K. J. J. P. T.: *Atmospheric Chemistry and Physics: From Air Pollution to Climate Change*, 51, 88-90, 1998.

Yarwood, G., Rao, S., Yocke, M., and Whitten, G.: Updates to the carbon bond chemical mechanism: CB05 final report to the US EPA, RT-0400675, 2005.

Zhang, L., Brook, J. R., and Vet, R.: A revised parameterization for gaseous dry deposition in air-quality models, *Atmos. Chem. Phys.*, 3, 2067-2082, 10.5194/acp-3-2067-2003, 2003.

Zhang, L., Gong, S., Padro, J., and Barrie, L.: A size-segregated particle dry deposition scheme for an atmospheric aerosol module, *Atmospheric Environment*, 35, 549-560, [https://doi.org/10.1016/S1352-2310\(00\)00326-5](https://doi.org/10.1016/S1352-2310(00)00326-5), 2001.
